# Supplementary material for: Analysis of seminal plasma from brown bear (Ursus arctos) during the breeding season: Its relationship with testosterone levels
Source: PLOS journal article supplement (doi:10.1371/journal.pone.0181776), 2017-08-03
Supplement: S1 (10.1371/journal.pone.0181776.s001) [file journal.pone.0181776.s001]

| Quincena | Bear    | Testosterona | TESTOSTERONA (ng/mL) |
|----------|---------|--------------|----------------------|
| Q05      | Bear_01 | 0,1          | Baja                 |
| Q05      | Bear_04 | 1,43         | Baja                 |
| Q06      | Bear_02 | 0,8          | Baja                 |
| Q06      | Bear_03 | 1,803        | <b>Baja</b>          |
| Q07      | Bear_05 | 5,74         | Alta                 |
| Q07      | Bear_06 | 6,46         | Alta                 |
| Q07      | Bear_11 | 18,08        | Alta                 |
| Q07      | Bear_13 | 19,31        | Alta                 |
| Q07      | Bear_14 | 17,88        | Alta                 |
| Q07      | Bear_42 | 0,109        | Baja                 |
| Q08      | Bear_07 | 9,76         | Alta                 |
| Q08      | Bear_08 | 8,91         | Alta                 |
| Q08      | Bear_09 | 10,35        | Alta                 |
| Q08      | Bear_10 | 12,93        | <b>Alta</b>          |
| Q08      | Bear_15 | 26,59        | Alta                 |
| Q08      | Bear_16 | 30           | Alta                 |
| Q09      | Bear_19 | 3,69         | Baja                 |
| Q09      | Bear_21 | 9,65         | Alta                 |
| Q09      | Bear_23 | 12,16        | Alta                 |
| Q09      | Bear_24 | 14,63        | Alta                 |
| Q09      | Bear_25 | 15,79        | Alta                 |
| Q09      | Bear_43 | 7,85         | Alta                 |
| Q10      | Bear_17 | 2,28         | Baja                 |
| Q10      | Bear_18 | 2,69         | Baja                 |
| Q10      | Bear_20 | 6,45         | Alta                 |
| Q10      | Bear_22 | 8,88         | Alta                 |
| Q10      | Bear_26 | 15,61        | Alta                 |
| Q10      | Bear_27 | 16,4         | Alta                 |
| Q10      | Bear_29 | 16,11        | Alta                 |
| Q10      | Bear_30 | 13,52        | Alta                 |
| Q10      | Bear_31 | 18,94        | Alta                 |
| Q10      | Bear_32 | 17,12        | Alta                 |
| Q11      | Bear_36 | 0,882        | Baja                 |
| Q11      | Bear_37 | 1,382        | Baja                 |
| Q11      | Bear_38 | 1,487        | Baja                 |
| Q11      | Bear_39 | 0,669        | Baja                 |
| Q11      | Bear_40 | 0,812        | Baja                 |
| Q12      | Bear_34 | 0,191        | Baja                 |
| Q12      | Bear_35 | 0,186        | Baja                 |
| Q12      | Bear_41 | 3,61         | Baja                 |
| Q13      | Bear_44 | 0,601        | <b>Baja</b>          |
