# Supplementary material for: Analysis of seminal plasma from brown bear (Ursus arctos) during the breeding season: Its relationship with testosterone levels
Source: PLOS journal article supplement (doi:10.1371/journal.pone.0181776), 2017-08-03
Supplement: S1 (10.1371/journal.pone.0181776.s001) [file journal.pone.0181776.s001]

| Muestra | Testosterona | ZINC | Unidades_ZINC |
|---------|--------------|------|---------------|
| S01     | Baja         | 16,2 | µg/dL         |
| S02     | Baja         | 19,3 | µg/dL         |
| S03     | Baja         | 35,0 | µg/dL         |
| S04     | Baja         |      | µg/dL         |
| S05     | Baja         |      | µg/dL         |
| S06     | Baja         | 36,1 | µg/dL         |
| S07     | Baja         | 23,5 | µg/dL         |
| S08     | Baja         | 30,8 | µg/dL         |
| S09     | Baja         | 23,0 | µg/dL         |
| S10     | Baja         |      | µg/dL         |
| S11     | Alta         |      | µg/dL         |
| S12     | Alta         | 15,1 | µg/dL         |
| S13     | Alta         | 27,2 | µg/dL         |
| S14     | Alta         | 20,6 | µg/dL         |
| S15     | Alta         |      | µg/dL         |
| S16     | Alta         | 41,3 | µg/dL         |
| S17     | Alta         | 21,6 | µg/dL         |
| S18     | Alta         | 27,5 | µg/dL         |
| S19     | Alta         | 23,0 | µg/dL         |
| S20     | Alta         | 49,0 | µg/dL         |
