# Supplementary material for: Analysis of seminal plasma from brown bear (Ursus arctos) during the breeding season: Its relationship with testosterone levels
Source: PLOS journal article supplement (doi:10.1371/journal.pone.0181776), 2017-08-03
Supplement: S1 (10.1371/journal.pone.0181776.s001) [file journal.pone.0181776.s001]

| Sample | Test_Level | Vol | Conc  | SPZ    | pH   | PO  | MIH   | MPH   | VAP    | VCL    | VSL    | LIN   | STR   | WOB   | ALH  | BCF   |
|--------|------------|-----|-------|--------|------|-----|-------|-------|--------|--------|--------|-------|-------|-------|------|-------|
| S06    | Alto       | 3,2 | 444,8 | 1423,5 | 7,76 | 245 | 64,86 | 36,49 | 73,21  | 113,67 | 55,39  | 43,71 | 67,82 | 64,22 | 4,29 | 7,82  |
| S07    | Alto       | 2,7 | 44,2  | 119,3  | 8,69 | 332 | 74,01 | 51,62 | 77,01  | 113,22 | 64,65  | 53,39 | 75,94 | 68,34 | 4,11 | 7,54  |
| S08    | Alto       |     |       |        |      |     |       |       |        |        |        |       |       |       |      |       |
| S09    | Alto       | 1,8 | 423,2 | 761,8  | 8,20 | 255 | 80,06 | 40,80 | 77,84  | 109,66 | 51,64  | 44,07 | 63,11 | 69,31 | 4,20 | 6,18  |
| S10    | Alto       | 2,6 | 38,9  | 101,1  | 8,27 | 323 | 82,14 | 20,24 | 115,34 | 137,72 | 50,62  | 36,92 | 44,64 | 82,54 | 4,29 | 3,59  |
| S12    | Alto       | 1,0 | 34,4  | 34,4   | 8,09 | 235 | 78,61 | 49,71 | 68,71  | 109,09 | 52,94  | 43,78 | 69,20 | 60,89 | 4,48 | 6,48  |
| S13    | Alto       |     |       |        |      |     |       |       |        |        |        |       |       |       |      |       |
| S14    | Alto       | 1,5 | 479,8 | 719,6  | 7,98 | 287 | 74,23 | 35,29 | 92,95  | 140,99 | 70,22  | 48,56 | 72,37 | 65,93 | 5,50 | 7,20  |
| S15    | Alto       |     |       |        |      |     |       |       |        |        |        |       |       |       |      |       |
| S16    | Alto       | 1,4 | 146,4 | 205,0  | 8,24 | 281 | 92,82 | 70,51 | 115,33 | 165,59 | 91,66  | 53,89 | 76,66 | 69,32 | 5,89 | 8,74  |
| S17    | Alto       |     |       |        |      |     |       |       |        |        |        |       |       |       |      |       |
| S18    | Alto       | 1,6 | 584,7 | 935,5  | 8,45 | 308 | 92,44 | 73,11 | 122,81 | 192,50 | 103,44 | 51,47 | 79,63 | 62,92 | 6,41 | 10,35 |
| S19    | Alto       | 3,2 | 37,2  | 119,1  | 7,42 | 208 | 69,77 | 18,60 | 93,27  | 115,30 | 39,08  | 35,41 | 45,03 | 79,03 | 3,81 | 3,06  |
| S21    | Alto       | 2,4 | 156,1 | 374,6  | 8,44 | 300 | 77,22 | 44,44 | 120,25 | 176,97 | 97,79  | 52,99 | 77,57 | 67,21 | 6,11 | 9,44  |
| S22    | Alto       | 2,3 | 100,4 | 230,9  | 8,28 | 300 | 80,63 | 38,34 | 106,55 | 167,52 | 79,47  | 47,11 | 72,68 | 64,08 | 6,57 | 7,64  |
| S24    | Alto       | 3,5 | 11,9  | 41,8   | 8,37 | 306 | 70,34 | 14,48 | 86,73  | 98,38  | 42,74  | 43,50 | 50,47 | 86,34 | 2,76 | 5,24  |
| S25    | Alto       | 5,3 | 50,4  | 266,9  | 8,51 | 305 | 88,79 | 21,23 | 132,65 | 152,15 | 73,43  | 48,67 | 56,57 | 85,93 | 3,98 | 3,76  |
| S26    | Alto       | 1,9 | 203,2 | 386,2  | 8,57 | 298 | 88,89 | 51,28 | 113,86 | 154,12 | 90,79  | 58,76 | 77,98 | 75,73 | 5,18 | 8,36  |
| S27    | Alto       | 2,5 | 252,6 | 631,5  | 8,51 | 302 | 91,22 | 43,90 | 108,74 | 150,41 | 81,64  | 52,90 | 72,18 | 73,35 | 5,26 | 7,67  |
| S28    | Alto       | 1,9 | 852,1 | 1619,0 | 8,41 | 320 | 85,20 | 75,34 | 149,66 | 205,45 | 134,15 | 63,42 | 86,70 | 72,12 | 5,85 | 12,03 |
| S32    | Alto       |     |       |        |      |     |       |       |        |        |        |       |       |       |      |       |
| S42    | Alto       | 2,2 | 31,6  | 69,5   | 8,43 | 327 | 52,76 | 48,03 | 127,30 | 180,64 | 116,54 | 63,15 | 89,04 | 70,11 | 5,90 | 10,91 |
| S43    | Alto       | 2,0 | 74,6  | 149,2  | 8,39 | 326 | 58,01 | 44,20 | 98,58  | 139,72 | 87,36  | 56,83 | 80,09 | 69,06 | 4,65 | 7,84  |
| S44    | Alto       | 4,5 | 137,3 | 617,8  | 8,29 | 302 | 72,43 | 58,38 | 107,82 | 170,04 | 89,84  | 51,70 | 80,47 | 63,07 | 6,41 | 9,52  |
| S45    | Alto       | 2,0 | 29,2  | 58,4   | 8,16 | 269 | 84,24 | 48,37 | 106,60 | 150,19 | 71,11  | 45,58 | 64,63 | 71,96 | 5,45 | 6,64  |
| S47    | Alto       | 4,0 | 211,6 | 846,3  | 8,03 | 304 | 66,22 | 54,50 | 120,78 | 173,73 | 107,90 | 56,31 | 82,45 | 66,80 | 5,44 | 11,46 |
| S01    | Bajo       | 1,4 | 54,4  | 76,2   | 8,07 | 241 | 68,92 | 29,43 | 59,78  | 80,66  | 37,67  | 42,82 | 60,93 | 69,39 | 2,95 | 5,71  |
| S02    | Bajo       | 1,7 | 12,8  | 21,8   | 8,45 | 309 | 24,68 | 16,60 | 71,64  | 102,61 | 59,18  | 48,73 | 72,25 | 66,11 | 3,84 | 6,01  |
| S03    | Bajo       | 2,7 | 263,1 | 710,4  | 8,37 |     | 78,19 | 31,65 | 68,36  | 109,67 | 43,45  | 38,32 | 58,88 | 61,84 | 4,49 | 6,66  |
| S04    | Bajo       | 2,0 | 170,8 | 341,6  | 8,25 | 301 | 85,86 | 50,30 | 110,71 | 135,88 | 79,41  | 55,57 | 68,58 | 79,27 | 4,07 | 7,16  |
| S05    | Bajo       | 1,8 | 10,0  | 18,0   | 8,18 | 296 | 57,23 | 48,80 | 127,71 | 160,90 | 110,04 | 65,83 | 83,87 | 78,11 | 4,87 | 7,85  |
| S11    | Bajo       | 3,5 | 188,1 | 658,4  | 8,15 | 305 | 77,68 | 59,65 | 85,17  | 129,59 | 67,20  | 52,71 | 77,49 | 66,80 | 5,13 | 8,86  |
| S20    | Bajo       | 4,2 | 180,2 | 756,8  | 8,24 | 303 | 83,92 | 28,62 | 88,12  | 154,42 | 62,89  | 41,42 | 69,48 | 58,38 | 6,52 | 5,51  |
| S23    | Bajo       | 1,6 | 415,2 | 664,3  | 7,46 | 255 | 80,81 | 51,52 | 70,50  | 110,81 | 54,89  | 45,31 | 70,01 | 63,09 | 4,42 | 7,25  |
| S29    | Bajo       | 2,7 | 95,0  | 256,4  | 7,92 | 309 | 70,80 | 40,60 | 117,17 | 142,47 | 81,58  | 52,89 | 66,21 | 79,38 | 4,33 | 6,09  |
| S30    | Bajo       | 1,3 | 509,3 | 662,1  | 8,79 | 297 | 94,21 | 50,99 | 110,82 | 184,79 | 83,92  | 45,17 | 73,99 | 60,28 | 7,85 | 8,89  |
| S31    | Bajo       |     |       |        |      | 315 |       |       |        |        |        |       |       |       |      |       |
| S33    | Bajo       | 4,2 | 16,0  | 67,2   | 8,63 | 311 | 71,07 | 44,63 | 106,36 | 149,91 | 78,41  | 50,46 | 69,37 | 71,74 | 4,16 | 5,62  |
| S34    | Bajo       | 3,0 | 105,5 | 316,6  | 8,48 | 275 | 91,62 | 48,48 | 125,57 | 172,72 | 90,69  | 52,10 | 71,23 | 73,34 | 5,75 | 7,63  |
| S35    | Bajo       | 3,0 | 64,5  | 193,5  | 8,23 | 272 |       |       |        |        |        |       |       |       |      |       |
| S36    | Bajo       | 1,8 | 63,0  | 113,3  | 8,73 |     | 91,15 | 78,76 | 130,82 | 195,70 | 110,38 | 56,39 | 82,77 | 67,42 | 6,33 | 8,22  |
| S37    | Bajo       | 3,0 | 44,4  | 133,1  | 8,29 | 295 | 91,86 | 68,70 | 154,48 | 188,29 | 133,13 | 69,84 | 84,60 | 82,03 | 5,21 | 10,78 |
| S38    | Bajo       | 1,5 | 193,8 | 290,7  | 7,70 | 295 | 53,85 | 28,74 | 117,22 | 139,73 | 76,52  | 52,72 | 63,68 | 82,40 | 4,21 | 4,87  |
| S39    | Bajo       | 2,9 | 197,5 | 572,9  | 8,06 | 322 | 95,17 | 25,00 | 114,01 | 142,82 | 67,76  | 46,42 | 59,11 | 78,57 | 4,48 | 5,00  |
| S40    | Bajo       | 2,3 | 307,9 | 708,1  | 8,04 | 305 | 88,82 | 43,35 | 96,37  | 164,57 | 74,63  | 44,88 | 74,00 | 59,43 | 6,71 | 8,57  |
| S41    | Bajo       | 1,4 | 235,5 | 329,7  | 8,47 | 313 |       |       |        |        |        |       |       |       |      |       |
| S46    | Bajo       | 2,4 | 146,7 | 352,1  | 7,99 | 271 | 90,73 | 67,32 | 93,22  | 141,88 | 77,37  | 51,83 | 77,80 | 64,86 | 5,44 | 8,51  |
