# Supplementary material for: Analysis of seminal plasma from brown bear (Ursus arctos) during the breeding season: Its relationship with testosterone levels
Source: PLOS journal article supplement (doi:10.1371/journal.pone.0181776), 2017-08-03
Supplement: S1 (10.1371/journal.pone.0181776.s001) [file journal.pone.0181776.s001]

| ID   | Testosterone | Gel           | SpotGel | X   | Y   | pl    | MW    | Vol   | Area  |
|------|--------------|---------------|---------|-----|-----|-------|-------|-------|-------|
| A-14 | alta         | 44---10-06-11 | 1324    | 843 | 218 | 6,995 | 76816 | 0,233 | 3,060 |
| A-14 | alta         | 45---10-06-11 | 1215    | 846 | 209 | 7,071 | 77053 | 0,125 | 2,472 |
| A-14 | alta         | 48---10-06-11 | 1449    | 846 | 221 | 7,071 | 77053 | 0,441 | 2,794 |
| A-14 | alta         | 15---10-06-01 | 1096    | 884 | 215 | 7,030 | 77053 | 0,159 | 2,710 |
| A-14 | baja         | 26---10-06-07 | 1149    | 826 | 225 | 7,040 | 77053 | 0,048 | 1,395 |
| A-14 | baja         | 29---10-06-07 | 1357    | 825 | 196 | 7,061 | 77053 | 0,368 | 3,935 |
| A-14 | baja         | 30---10-06-07 | 1156    | 833 | 203 | 7,050 | 77053 | 0,146 | 2,980 |
| A-14 | baja         | 36---10-06-10 | 1198    | 845 | 197 | 6,990 | 77291 | 0,041 | 1,153 |
| A-14 | baja         | 46---10-06-11 | 1165    | 841 | 213 | 7,030 | 77291 | 0,121 | 2,290 |
| A-14 | baja         | 07---10-05-28 | 1358    | 848 | 203 | 7,020 | 77529 | 0,438 | 3,690 |
| A-14 | baja         | 09---10-06-01 | 1084    | 867 | 196 | 7,071 | 77529 | 0,196 | 2,742 |
| A-14 | baja         | 14---10-06-01 | 936     | 836 | 202 | 7,030 | 77529 | 0,193 | 2,798 |
| A-14 | baja         | 17---10-06-01 | 1465    | 877 | 190 | 7,040 | 77769 | 0,214 | 3,577 |
| A-14 | baja         | 20---10-06-01 | 1031    | 847 | 180 | 7,050 | 77769 | 0,565 | 3,484 |
| A-15 | alta         | 28---10-06-07 | 2255    | 888 | 232 | 7,595 | 71396 | 0,123 | 1,335 |
| A-15 | alta         | 31---10-06-07 | 1508    | 891 | 244 | 7,646 | 71798 | 0,057 | 2,536 |
| A-15 | alta         | 34---10-06-10 | 1290    | 899 | 239 | 7,636 | 72445 | 0,181 | 3,798 |
| A-15 | alta         | 37---10-06-10 | 1427    | 875 | 233 | 7,656 | 72445 | 0,223 | 3,407 |
| A-15 | alta         | 38---10-06-10 | 1162    | 869 | 225 | 7,636 | 72669 | 0,153 | 2,718 |
| A-15 | alta         | 40---10-06-10 | 1205    | 878 | 233 | 7,626 | 72669 | 0,185 | 2,714 |
| A-15 | alta         | 44---10-06-11 | 1348    | 900 | 237 | 7,575 | 72669 | 0,068 | 1,560 |
| A-15 | alta         | 45---10-06-11 | 1248    | 898 | 230 | 7,606 | 72669 | 0,052 | 2,399 |
| A-15 | alta         | 48---10-06-11 | 1473    | 895 | 244 | 7,565 | 72669 | 0,122 | 1,476 |
| A-15 | alta         | 15---10-06-01 | 1133    | 953 | 243 | 7,727 | 72893 | 0,063 | 1,810 |
| A-15 | baja         | 26---10-06-07 | 1166    | 889 | 247 | 7,686 | 73118 | 0,059 | 2,335 |
| A-15 | baja         | 29---10-06-07 | 1379    | 876 | 215 | 7,575 | 73118 | 0,140 | 1,827 |
| A-15 | baja         | 30---10-06-07 | 1202    | 890 | 226 | 7,626 | 73118 | 0,153 | 2,879 |
| A-15 | baja         | 36---10-06-10 | 1223    | 905 | 214 | 7,585 | 73118 | 0,033 | 1,181 |
| A-15 | baja         | 46---10-06-11 | 1191    | 896 | 237 | 7,606 | 73118 | 0,052 | 1,512 |
| A-15 | baja         | 07---10-05-28 | 1395    | 900 | 223 | 7,545 | 73118 | 0,078 | 1,548 |
| A-15 | baja         | 09---10-06-01 | 1105    | 913 | 218 | 7,535 | 73344 | 0,090 | 1,851 |
| A-15 | baja         | 14---10-06-01 | 963     | 886 | 224 | 7,545 | 73344 | 0,142 | 2,520 |
| A-15 | baja         | 17---10-06-01 | 1507    | 927 | 212 | 7,545 | 73344 | 0,066 | 1,734 |
| A-15 | baja         | 20---10-06-01 | 1072    | 892 | 204 | 7,525 | 73344 | 0,108 | 0,931 |
| A-16 | alta         | 28---10-06-07 | 2271    | 139 | 242 | 4,071 | 64710 | 0,055 | 2,278 |
| A-16 | alta         | 31---10-06-07 | 1532    | 150 | 265 | 4,121 | 65995 | 0,082 | 2,266 |
| A-16 | alta         | 34---10-06-10 | 1339    | 147 | 278 | 4,107 | 65995 | 0,077 | 1,702 |
| A-16 | alta         | 37---10-06-10 | 1494    | 139 | 275 | 3,991 | 66741 | 0,058 | 2,492 |
| A-16 | alta         | 44---10-06-11 | 1381    | 132 | 270 | 3,893 | 67306 | 0,100 | 3,694 |
| A-16 | alta         | 45---10-06-11 | 1305    | 167 | 273 | 4,148 | 67685 | 0,126 | 4,165 |
| A-16 | alta         | 15---10-06-01 | 1157    | 220 | 260 | 4,319 | 68066 | 0,131 | 1,883 |
| A-16 | baja         | 29---10-06-07 | 1411    | 140 | 238 | 4,135 | 68258 | 0,092 | 1,601 |
| A-16 | baja         | 14---10-06-01 | 1004    | 161 | 263 | 4,189 | 70400 | 0,018 | 1,117 |
| A-17 | alta         | 28---10-06-07 | 2285    | 359 | 253 | 5,254 | 62565 | 0,079 | 1,923 |
| A-19 | alta         | 31---10-06-07 | 1610    | 472 | 313 | 5,564 | 59147 | 0,029 | 0,500 |
| A-19 | alta         | 34---10-06-10 | 1393    | 479 | 325 | 5,567 | 59816 | 0,070 | 1,085 |
| A-19 | alta         | 38---10-06-10 | 1268    | 476 | 295 | 5,558 | 60491 | 0,118 | 0,726 |
| A-19 | alta         | 44---10-06-11 | 1442    | 503 | 312 | 5,567 | 60662 | 0,067 | 0,879 |
| A-19 | alta         | 45---10-06-11 | 1344    | 497 | 299 | 5,555 | 60662 | 0,043 | 0,835 |
| A-19 | alta         | 28---10-06-07 | 1628    | 451 | 302 | 5,412 | 60584 | 0,067 | 0,703 |
| A-19 | baja         | 30---10-06-07 | 1355    | 501 | 306 | 5,365 | 61083 | 0,059 | 0,875 |
| A-19 | baja         | 07---10-05-28 | 1090    | 423 | 294 | 5,537 | 59843 | 0,069 | 0,901 |
| A-19 | baja         | 46---10-06-11 | 1285    | 497 | 309 | 5,555 | 61003 | 0,066 | 1,085 |
| A-23 | alta         | 28---10-06-07 | 2400    | 504 | 368 | 5,680 | 48382 | 0,376 | 2,843 |
| A-23 | alta         | 31---10-06-07 | 1679    | 511 | 387 | 5,677 | 49138 | 0,053 | 2,004 |

|      |      |       |          |      |     |      |       |       |       |       |
|------|------|-------|----------|------|-----|------|-------|-------|-------|-------|
| A-23 | alta | 34--- | 10-06-10 | 1454 | 516 | 392  | 5,677 | 49138 | 0,088 | 2,125 |
| A-23 | alta | 37--- | 10-06-10 | 1614 | 522 | 386  | 5,697 | 49276 | 0,117 | 1,879 |
| A-23 | alta | 38--- | 10-06-10 | 1347 | 521 | 369  | 5,706 | 49554 | 0,085 | 2,593 |
| A-23 | alta | 40--- | 10-06-10 | 1390 | 529 | 390  | 5,714 | 49693 | 0,212 | 2,065 |
| A-23 | alta | 44--- | 10-06-11 | 1513 | 543 | 393  | 5,700 | 50114 | 0,028 | 2,327 |
| A-23 | alta | 45--- | 10-06-11 | 1422 | 536 | 381  | 5,685 | 50538 | 0,020 | 1,476 |
| A-23 | alta | 48--- | 10-06-11 | 1623 | 522 | 394  | 5,677 | 50538 | 0,329 | 2,290 |
| A-23 | alta | 15--- | 10-06-01 | 1281 | 571 | 377  | 5,685 | 50965 | 0,027 | 1,891 |
| A-23 | baja | 29--- | 10-06-07 | 1577 | 499 | 363  | 5,677 | 51541 | 0,038 | 1,548 |
| A-23 | baja | 46--- | 10-06-11 | 1354 | 540 | 389  | 5,688 | 51686 | 0,055 | 1,673 |
| A-23 | baja | 07--- | 10-05-28 | 1571 | 529 | 376  | 5,674 | 51832 | 0,196 | 1,778 |
| A-23 | baja | 09--- | 10-06-01 | 1226 | 546 | 351  | 5,682 | 52861 | 0,045 | 0,815 |
| A-23 | baja | 17--- | 10-06-01 | 1684 | 564 | 368  | 5,688 | 53911 | 0,022 | 1,008 |
| A-26 | alta | 28--- | 10-06-07 | 2461 | 307 | 445  | 5,104 | 39638 | 0,144 | 3,940 |
| A-26 | alta | 31--- | 10-06-07 | 1761 | 301 | 493  | 5,069 | 39710 | 0,104 | 2,714 |
| A-26 | alta | 34--- | 10-06-10 | 1521 | 324 | 489  | 5,127 | 39926 | 0,419 | 6,770 |
| A-26 | alta | 37--- | 10-06-10 | 1673 | 302 | 486  | 5,046 | 40071 | 0,220 | 5,915 |
| A-26 | alta | 38--- | 10-06-10 | 1406 | 297 | 468  | 5,061 | 40363 | 0,498 | 7,540 |
| A-26 | alta | 44--- | 10-06-11 | 1555 | 326 | 485  | 5,081 | 40436 | 0,640 | 7,597 |
| A-26 | alta | 45--- | 10-06-11 | 1485 | 328 | 489  | 5,090 | 40804 | 0,660 | 5,956 |
| A-26 | alta | 48--- | 10-06-11 | 1689 | 303 | 505  | 5,058 | 40878 | 0,143 | 3,944 |
| A-26 | baja | 26--- | 10-06-07 | 1355 | 314 | 500  | 5,078 | 41026 | 0,440 | 5,169 |
| A-26 | baja | 29--- | 10-06-07 | 1661 | 293 | 467  | 5,084 | 41101 | 0,037 | 1,452 |
| A-33 | alta | 28--- | 10-06-07 | 2550 | 390 | 572  | 5,344 | 31909 | 0,346 | 4,847 |
| A-33 | alta | 31--- | 10-06-07 | 1850 | 406 | 609  | 5,373 | 32993 | 0,513 | 5,214 |
| A-33 | alta | 34--- | 10-06-10 | 1601 | 412 | 604  | 5,376 | 33159 | 0,190 | 4,500 |
| A-33 | alta | 37--- | 10-06-10 | 1738 | 409 | 594  | 5,347 | 33159 | 0,220 | 6,641 |
| A-33 | alta | 40--- | 10-06-10 | 1529 | 445 | 600  | 5,434 | 33381 | 0,395 | 6,185 |
| A-33 | alta | 40--- | 10-06-10 | 1535 | 413 | 598  | 5,347 | 33493 | 0,064 | 1,972 |
| A-33 | alta | 44--- | 10-06-11 | 1624 | 425 | 600  | 5,350 | 33493 | 0,038 | 2,048 |
| A-33 | alta | 45--- | 10-06-11 | 1567 | 428 | 621  | 5,364 | 33549 | 0,123 | 6,060 |
| A-33 | alta | 48--- | 10-06-11 | 1767 | 403 | 612  | 5,341 | 33549 | 0,282 | 3,149 |
| A-33 | alta | 15--- | 10-06-01 | 1397 | 460 | 568  | 5,370 | 33549 | 0,018 | 1,218 |
| A-33 | baja | 26--- | 10-06-07 | 1432 | 404 | 627  | 5,341 | 33549 | 0,023 | 2,206 |
| A-33 | baja | 29--- | 10-06-07 | 1745 | 388 | 569  | 5,359 | 33605 | 0,193 | 4,093 |
| A-33 | baja | 46--- | 10-06-11 | 1501 | 457 | 605  | 5,448 | 33661 | 0,077 | 2,270 |
| A-33 | baja | 07--- | 10-05-28 | 1735 | 416 | 591  | 5,356 | 33661 | 0,187 | 3,403 |
| A-33 | baja | 09--- | 10-06-01 | 1348 | 434 | 569  | 5,361 | 33717 | 0,056 | 1,895 |
| A-33 | baja | 17--- | 10-06-01 | 1835 | 468 | 580  | 5,414 | 34105 | 0,235 | 5,956 |
| A-37 | alta | 28--- | 10-06-07 | 2633 | 323 | 990  | 5,150 | 15953 | 0,015 | 2,141 |
| A-37 | alta | 31--- | 10-06-07 | 1993 | 333 | 1042 | 5,162 | 16006 | 0,219 | 3,359 |
| A-37 | alta | 34--- | 10-06-10 | 1693 | 343 | 1041 | 5,182 | 16006 | 0,242 | 8,504 |
| A-37 | alta | 37--- | 10-06-10 | 1838 | 335 | 1006 | 5,139 | 16060 | 0,028 | 3,734 |
| A-37 | alta | 44--- | 10-06-11 | 1709 | 350 | 1011 | 5,147 | 16114 | 0,046 | 5,137 |
| A-37 | alta | 45--- | 10-06-11 | 1669 | 356 | 1036 | 5,165 | 16303 | 0,070 | 5,383 |
| A-37 | alta | 48--- | 10-06-11 | 1862 | 331 | 1053 | 5,139 | 16358 | 0,065 | 2,198 |
| A-37 | baja | 26--- | 10-06-07 | 1517 | 328 | 1056 | 5,119 | 16522 | 0,155 | 5,472 |
| A-37 | baja | 29--- | 10-06-07 | 1866 | 323 | 1021 | 5,171 | 16745 | 0,093 | 3,617 |
| A-37 | baja | 36--- | 10-06-10 | 1624 | 338 | 906  | 5,136 | 16885 | 0,011 | 1,972 |
| A-37 | baja | 46--- | 10-06-11 | 1582 | 371 | 1047 | 5,217 | 16913 | 0,056 | 2,815 |
| A-37 | baja | 07--- | 10-05-28 | 1860 | 350 | 1015 | 5,174 | 17783 | 0,073 | 5,190 |
| B-03 | alta | 28--- | 10-06-07 | 2239 | 693 | 217  | 6,323 | 73571 | 0,082 | 1,290 |
| B-03 | alta | 31--- | 10-06-07 | 1499 | 690 | 235  | 6,292 | 73798 | 0,103 | 1,819 |
| B-03 | alta | 34--- | 10-06-10 | 1282 | 708 | 233  | 6,349 | 74484 | 0,047 | 1,226 |
| B-03 | alta | 37--- | 10-06-10 | 1417 | 717 | 218  | 6,478 | 74714 | 0,024 | 0,653 |
| B-03 | alta | 38--- | 10-06-10 | 1147 | 722 | 208  | 6,525 | 75641 | 0,052 | 0,734 |

|      |      |               |      |     |     |       |       |       |       |
|------|------|---------------|------|-----|-----|-------|-------|-------|-------|
| B-03 | alta | 40---10-06-10 | 1191 | 721 | 219 | 6,478 | 75874 | 0,121 | 1,573 |
| B-03 | alta | 44---10-06-11 | 1327 | 728 | 216 | 6,390 | 76109 | 0,091 | 1,371 |
| B-03 | alta | 45---10-06-11 | 1230 | 721 | 210 | 6,370 | 76109 | 0,058 | 1,286 |
| B-03 | alta | 48---10-06-11 | 1403 | 700 | 210 | 6,282 | 76109 | 0,440 | 2,157 |
| B-03 | alta | 15---10-06-01 | 1100 | 767 | 216 | 6,406 | 76109 | 0,091 | 1,238 |
| B-03 | baja | 26---10-06-07 | 1153 | 708 | 228 | 6,396 | 76579 | 0,044 | 0,577 |
| B-03 | baja | 29---10-06-07 | 1376 | 703 | 209 | 6,406 | 76579 | 0,146 | 1,173 |
| B-03 | baja | 30---10-06-07 | 1182 | 707 | 209 | 6,370 | 76579 | 0,190 | 1,536 |
| B-03 | baja | 36---10-06-10 | 1212 | 745 | 207 | 6,468 | 77053 | 0,053 | 1,141 |
| B-03 | baja | 46---10-06-11 | 1164 | 722 | 212 | 6,370 | 77291 | 0,060 | 1,020 |
| B-03 | baja | 07---10-05-28 | 1364 | 714 | 202 | 6,323 | 77529 | 0,100 | 1,351 |
| B-03 | baja | 09---10-06-01 | 1093 | 733 | 206 | 6,349 | 77529 | 0,073 | 0,738 |
| B-03 | baja | 14---10-06-01 | 946  | 712 | 208 | 6,365 | 77769 | 0,033 | 0,645 |
| B-03 | baja | 17---10-06-01 | 1487 | 750 | 191 | 6,359 | 77769 | 0,036 | 0,407 |
| B-03 | baja | 20---10-06-01 | 1020 | 727 | 179 | 6,385 | 80452 | 0,320 | 3,371 |
| B-06 | alta | 31---10-06-07 | 1617 | 519 | 319 | 5,700 | 57671 | 0,072 | 2,024 |
| B-06 | alta | 15---10-06-01 | 1227 | 568 | 316 | 5,677 | 57996 | 0,049 | 1,222 |
| B-06 | alta | 14---10-06-01 | 1062 | 537 | 305 | 5,185 | 51917 | 0,061 | 1,652 |
| B-06 | baja | 26---10-06-07 | 1269 | 510 | 330 | 5,659 | 58159 | 0,072 | 1,508 |
| B-06 | baja | 29---10-06-07 | 1481 | 511 | 294 | 5,709 | 58159 | 0,141 | 1,984 |
| B-06 | baja | 30---10-06-07 | 1313 | 515 | 313 | 5,671 | 58651 | 0,046 | 0,685 |
| B-06 | baja | 36---10-06-10 | 1338 | 537 | 295 | 5,694 | 58981 | 0,081 | 1,149 |
| B-06 | baja | 46---10-06-11 | 1301 | 536 | 322 | 5,677 | 58981 | 0,056 | 1,109 |
| B-06 | baja | 07---10-05-28 | 1516 | 528 | 317 | 5,671 | 59147 | 0,076 | 1,488 |
| B-06 | baja | 14---10-06-01 | 1052 | 527 | 315 | 5,685 | 59147 | 0,198 | 3,052 |
| B-06 | baja | 17---10-06-01 | 1633 | 562 | 310 | 5,682 | 59314 | 0,060 | 1,206 |
| B-06 | baja | 20---10-06-01 | 1163 | 537 | 297 | 5,671 | 59648 | 0,119 | 1,645 |
| B-08 | alta | 28---10-06-07 | 2526 | 462 | 536 | 5,555 | 34527 | 0,047 | 2,714 |
| B-08 | alta | 31---10-06-07 | 1828 | 483 | 583 | 5,596 | 34740 | 0,061 | 2,548 |
| B-08 | alta | 40---10-06-10 | 1510 | 489 | 563 | 5,555 | 35008 | 0,043 | 1,343 |
| B-08 | alta | 45---10-06-11 | 1536 | 490 | 547 | 5,535 | 35332 | 0,025 | 0,565 |
| B-08 | alta | 48---10-06-11 | 1733 | 489 | 560 | 5,584 | 35769 | 0,031 | 2,875 |
| B-08 | baja | 29---10-06-07 | 1738 | 475 | 562 | 5,607 | 35825 | 0,038 | 1,161 |
| B-08 | baja | 36---10-06-10 | 1495 | 501 | 498 | 5,596 | 35880 | 0,251 | 3,161 |
| B-08 | baja | 46---10-06-11 | 1493 | 516 | 586 | 5,613 | 36157 | 0,058 | 1,798 |
| B-08 | baja | 07---10-05-28 | 1710 | 500 | 561 | 5,587 | 36380 | 0,131 | 2,347 |
| B-08 | baja | 17---10-06-01 | 1805 | 540 | 533 | 5,610 | 36548 | 0,044 | 1,238 |
