# Supplementary material for: Analysis of seminal plasma from brown bear (Ursus arctos) during the breeding season: Its relationship with testosterone levels
Source: PLOS journal article supplement (doi:10.1371/journal.pone.0181776), 2017-08-03
Supplement: S1 (10.1371/journal.pone.0181776.s001) [file journal.pone.0181776.s001]

| Sample | Quincena | Testosterona (ng/mL) |
|--------|----------|----------------------|
| S01    | 5        | 0,00                 |
| S02    | 5        | 1,74                 |
| S03    | 5        | 1,81                 |
| S04    | 5        | 3,59                 |
| S05    | 5        | 0,09                 |
| S06    | 5        | 0,97                 |
| S07    | 5        | 0,08                 |
| S08    | 5        | 1,43                 |
| S09    | 6        | 5,74                 |
| S10    | 6        | 5,99                 |
| S11    | 6        | 1,83                 |
| S12    | 6        | 4,00                 |
| S13    | 6        | 3,50                 |
| S14    | 6        | 11,20                |
| S15    | 6        | 0,80                 |
| S16    | 6        | 1,89                 |
| S17    | 7        | 7,12                 |
| S18    | 7        | 4,31                 |
| S19    | 7        | 1,96                 |
| S20    | 7        | 6,16                 |
| S21    | 7        | 30,00                |
| S22    | 7        | 12,91                |
| S23    | 7        | 12,93                |
| S24    | 7        | 19,28                |
| S25    | 7        | 7,75                 |
| S26    | 7        | 12,05                |
| S27    | 7        | 5,57                 |
| S28    | 7        | 30,00                |
| S29    | 7        | 1,47                 |
| S30    | 7        | 20,91                |
| S31    | 7        | 5,74                 |
| S32    | 7        | 3,18                 |
| S33    | 7        | 5,85                 |
| S34    | 7        | 2,25                 |
| S35    | 7        | 6,46                 |
| S36    | 8        | 17,47                |
| S37    | 8        | 30,00                |
| S38    | 8        | 9,48                 |
| S39    | 8        | 8,92                 |
| S40    | 8        | 2,30                 |
| S41    | 8        | 8,46                 |
| S42    | 8        | 9,76                 |
| S43    | 8        | 30,00                |
| S44    | 8        | 26,75                |
| S45    | 8        | 23,63                |

|     |    |       |
|-----|----|-------|
| S46 | 8  | 26,59 |
| S47 | 8  | 11,04 |
| S48 | 8  | 13,09 |
| S49 | 8  | 5,30  |
| S50 | 8  | 0,72  |
| S51 | 8  | 14,49 |
| S52 | 9  | 15,31 |
| S53 | 9  | 30,00 |
| S54 | 9  | 2,61  |
| S55 | 9  | 2,54  |
| S56 | 9  | 30,00 |
| S57 | 9  | 14,16 |
| S58 | 9  | 6,65  |
| S59 | 9  | 2,69  |
| S60 | 9  | 15,79 |
| S61 | 9  | 21,59 |
| S62 | 9  | 11,57 |
| S63 | 9  | 1,36  |
| S64 | 9  | 13,80 |
| S65 | 9  | 14,02 |
| S66 | 10 | 6,49  |
| S67 | 10 | 12,17 |
| S68 | 10 | 16,11 |
| S69 | 10 | 2,28  |
| S70 | 10 | 6,45  |
| S71 | 10 | 3,23  |
| S72 | 10 | 4,13  |
| S73 | 10 | 28,94 |
| S74 | 10 | 1,19  |
| S75 | 10 | 15,83 |
| S76 | 10 | 2,23  |
| S77 | 10 | 19,52 |
| S78 | 10 | 0,17  |
| S79 | 10 | 0,79  |
| S80 | 10 | 4,82  |
| S81 | 10 | 8,88  |
| S82 | 11 | 1,40  |
| S83 | 11 | 4,58  |
| S84 | 11 | 0,38  |
| S85 | 11 | 0,67  |
| S86 | 11 | 0,27  |
| S87 | 11 | 1,76  |
| S88 | 11 | 0,00  |
| S89 | 11 | 1,02  |
| S90 | 11 | 0,49  |
| S91 | 11 | 0,09  |

|      |    |      |
|------|----|------|
| S92  | 11 | 0,18 |
| S93  | 11 | 1,98 |
| S94  | 11 | 0,20 |
| S95  | 11 | 0,77 |
| S96  | 11 | 0,07 |
| S97  | 11 | 0,81 |
| S98  | 11 | 0,15 |
| S99  | 11 | 1,06 |
| S100 | 12 | 0,09 |
| S101 | 12 | 4,61 |
| S102 | 12 | 3,75 |
| S103 | 12 | 0,02 |
| S104 | 12 | 0,74 |
| S105 | 12 | 0,00 |
| S106 | 12 | 0,45 |
| S107 | 12 | 0,14 |
| S108 | 12 | 0,72 |
| S109 | 12 | 0,39 |
| S110 | 12 | 0,43 |
| S111 | 12 | 0,05 |
| S112 | 12 | 0,00 |
| S113 | 12 | 0,00 |
| S114 | 12 | 0,00 |
| S115 | 13 | 0,10 |
| S116 | 13 | 0,38 |
| S117 | 13 | 0,09 |
| S118 | 13 | 0,85 |
| S119 | 13 | 0,00 |
| S120 | 13 | 0,07 |
| S121 | 13 | 0,00 |
| S122 | 13 | 0,00 |
